# Supplementary material for: Health-focused conversational agents in person-centered care: a review of apps
Source: PubMed Central journal article supplement (PMC8854396; doi:10.1038/s41746-022-00560-6), 2022-02-17
Supplement: 41746_2022_560_MOESM1_ESM.pdf [file 41746_2022_560_MOESM1_ESM.pdf]

**Supplementary Table 1: List of all apps analyzed**

| Included Apps                                      |     |    |      |
|----------------------------------------------------|-----|----|------|
| App                                                | iOS | GP | Both |
| Ada ,Äi your health companion                      | x   |    |      |
| Adent Health                                       | x   |    |      |
| AfyaChats                                          |     | x  |      |
| AI based Smart Doctor                              |     | x  |      |
| AI DOC                                             |     | x  |      |
| AIDA - Ivy.ai Bot                                  | x   |    |      |
| Analyze skin problems   AI Skin Symptom Checker    |     | x  |      |
| Anesthesia Assistant                               | x   |    |      |
| Ask Mama                                           |     | x  |      |
| Basic Emergency Care                               |     |    | x    |
| BeCare Bot                                         | x   |    |      |
| BeSerene   Mind Training and Stress Management App |     |    | x    |
| Breathe for Asthma and COPD                        | x   |    |      |
| Brook Health Companion                             | x   |    |      |
| Careviz                                            | x   |    |      |
| Coach Orange                                       |     |    | x    |
| Confidant Health                                   | x   |    |      |
| COVID AI                                           | x   |    |      |
| COVID-19                                           | x   |    |      |
| Curable Pain Relief                                | x   |    |      |

|                                               |   |   |   |
|-----------------------------------------------|---|---|---|
| Diabcura: Personalised Diabetes Management    |   | x |   |
| DR Analyst                                    |   | x |   |
| Dr Lal PathLabs                               | x |   |   |
| Dr.Galen - Health                             | x |   |   |
| Driven Resilience App                         |   |   | x |
| Friendo ,Ài AI Virtual Friend                 | x |   |   |
| Fudo: Picky Eating Help                       | x |   |   |
| Gali Health                                   | x |   |   |
| GeneFAX                                       | x |   |   |
| Groove Health                                 |   |   | x |
| GYANT - Pocket Doctor                         | x |   |   |
| GYFT Baby                                     |   |   | x |
| Haby App                                      | x |   |   |
| Healthily: The Self-Care App                  | x |   |   |
| I need hugs                                   |   | x |   |
| InnerHour - Live Happier                      | x |   |   |
| Joyup Genie                                   |   | x |   |
| Khoch                                         |   | x |   |
| Lafiya App - 24/7 Telehealth Anywhere Anytime |   | x |   |
| LiveBetter                                    |   |   | x |
| LiveMD - Talk to a Doctor                     |   | x |   |
| Lotus - The Calming App                       | x |   |   |
| MayaMD                                        |   |   | x |

|                                |   |   |   |
|--------------------------------|---|---|---|
| Medic101                       |   | x |   |
| Meela                          |   |   | x |
| Mindspa-4UR Mental Wellbeing   | x |   |   |
| Muse Health                    |   |   | x |
| myFetalLife                    | x |   |   |
| MyHealthyGut: Guided Nutrition | x |   |   |
| Nathealth VA                   |   |   | x |
| OneTapCare Travel Health       | x |   |   |
| OWL Cancer Survivor Platform   |   |   | x |
| Ozee AI                        |   | x |   |
| PAŞHAKEEM                      |   | x |   |
| PocketFriend Digital Therapy   | x |   |   |
| QuitNow!                       | x |   |   |
| Replika - My AI Friend         | x |   |   |
| Rosie                          | x |   |   |
| RoundGlass Peace               | x |   |   |
| Sensely                        | x |   |   |
| SimbiHealth                    |   | x |   |
| SleepCoach                     | x |   |   |
| Smoke Free +                   | x |   |   |
| Sophie Bot                     |   | x |   |
| Tara Smyles                    |   | x |   |
| tellbeth                       |   |   | x |
| Thrive Nutrition Coach         | x |   |   |
| Tidda A.I                      |   | x |   |

|                                |   |   |   |
|--------------------------------|---|---|---|
| TrackActive Me: Virtual Physio | x |   |   |
| Velmio: Pregnancy Insights     | x |   |   |
| Venki - The Healthcare Chatbot |   | x |   |
| Vik Breast                     |   |   | x |
| Woebot - Your Self-Care Expert | x |   |   |
| Wysa: Mental Health Support    |   |   | x |
| Youper - Feel your best        |   |   | x |
| Zemedy - IBS, Gut Relief       | x |   |   |
| Zifcare                        |   |   | x |
| ZINI the Healthcare AI         |   | x |   |

**Supplementary Table 2: Total Number of Apps and Downloads by Country\***

| Continent | Country              | Total Number of Apps, per Country | Name of Apps                                                                                 | Total Number of Downloads |
|-----------|----------------------|-----------------------------------|----------------------------------------------------------------------------------------------|---------------------------|
| Africa    | Algeria              | 1                                 | Pashakeem                                                                                    | 32                        |
| Africa    | Angola               | 1                                 | Dr. Lal Pathlabs                                                                             | 5000                      |
| Africa    | Benin                | 1                                 | MayaMD                                                                                       | 1280                      |
| Africa    | Egypt                | 1                                 | Pashakeem                                                                                    | 924                       |
| Africa    | Kenya                | 1                                 | SophieBot                                                                                    | 5000                      |
| Africa    | Mali                 | 1                                 | MayaMD                                                                                       | 1380                      |
| Africa    | Mozambique           | 1                                 | Dr. Lal Pathlabs                                                                             | 5000                      |
| Africa    | Sudan                | 1                                 | Dr. Lal Pathlabs                                                                             | 6000                      |
| Africa    | Zimbabwe             | 2                                 | Dr. Lal Pathlabs;<br>MayaMD                                                                  | 6880                      |
| Asia      | Indonesia            | 1                                 | Wysa                                                                                         | 105000                    |
| Asia      | Nepal                | 1                                 | MayaMD                                                                                       | 680                       |
| Asia      | Saudi Arabia         | 1                                 | Pashakeem                                                                                    | 19                        |
| Asia      | United Arab Emirates | 1                                 | Pashakeem                                                                                    | 19                        |
| Asia      | Vietnam              | 1                                 | ZINI the Healthcare AI                                                                       | 35                        |
| Asia      | Malaysia             | 2                                 | Replika; Wysa                                                                                | 255000                    |
| Asia      | Myanmar              | 2                                 | MayaMD; Youper                                                                               | 245740                    |
| Asia      | Phillippines         | 4                                 | Analyze skin problems  <br>Skin Symptom Checker;<br>Replika; Wysa; ZINI the<br>Healthcare AI | 1244110                   |

|               |                |    |                                                                                                                                                                                                                               |         |
|---------------|----------------|----|-------------------------------------------------------------------------------------------------------------------------------------------------------------------------------------------------------------------------------|---------|
| Asia          | India          | 13 | Analyze skin problems  <br>Skin Symptom Checker;<br>BeSerene; Diabcura; Dr.<br>Lal Pathlabs; LiveBetter;<br>LiveMD: MindSpa-4UR<br>Mental Wellbeing; Ozee<br>AI; Replika; Wysa;<br>Youper; Zifcare; ZINI the<br>Healthcare AI | 1395993 |
| Australia     | Australia      | 3  | Curable Pain Relief;<br>Driven Resilience App;<br>LiveBetter                                                                                                                                                                  | 10552   |
| Europe        | France         | 1  | VikBreast                                                                                                                                                                                                                     | 100     |
| Europe        | Ireland        | 1  | Curable Pain Relief                                                                                                                                                                                                           | 2300    |
| Europe        | Poland         | 1  | Youper                                                                                                                                                                                                                        | 48000   |
| Europe        | Spain          | 1  | I need hugs                                                                                                                                                                                                                   | 42500   |
| Europe        | Ukraine        | 1  | MindSpa-4UR Mental<br>Wellbeing                                                                                                                                                                                               | 500     |
| Europe        | United Kingdom | 8  | Analyze skin problems  <br>Skin Symptom Checker;<br>Curable Pain Relief;<br>Driven Resilience App;<br>Healthily; I need hugs;<br>LiveBetter; MindSpa-4UR<br>Mental Wellbeing; Youper                                          | 658305  |
| Europe/Asia   | Russia         | 1  | MindSpa-4UR Mental<br>Wellbeing                                                                                                                                                                                               | 8210    |
| North America | El Salvador    | 1  | Healthily                                                                                                                                                                                                                     | 37000   |
| North America | Mexico         | 2  | Healthily; I need hugs                                                                                                                                                                                                        | 79750   |

|               |               |    |                                                                                                                                                                                                                                                 |         |
|---------------|---------------|----|-------------------------------------------------------------------------------------------------------------------------------------------------------------------------------------------------------------------------------------------------|---------|
| North America | Canada        | 5  | Analyze skin problems  <br>Skin Symptom Checker;<br>Curable Pain Relief;<br>Driven Resilience App;<br>Replika; ZINI the<br>Healthcare AI                                                                                                        | 192639  |
| North America | United States | 12 | Analyze skin problems  <br>Skin Symptom Checker;<br>Curable Pain Relief;<br>Driven Resilience App;<br>Groove Health; Healthily;<br>I need hugs; LiveMD;<br>MindSpa-4UR Mental<br>Wellbeing; Replika; Wysa;<br>Youper; ZINI the<br>Healthcare AI | 1875957 |
| Oceania       | New Zealand   | 1  | Driven Resilience App                                                                                                                                                                                                                           | 44      |
| South America | Argentina     | 1  | I need hugs                                                                                                                                                                                                                                     | 5450    |
| South America | Bolivia       | 1  | Healthily                                                                                                                                                                                                                                       | 39000   |

\*Data was only able to be abstracted for apps available on the Google Play Store in July 2020. For each app, data on the number of downloads was abstracted for 5 countries with the highest number of downloads.
